# Supplementary material for: Long Noncoding RNA SChLAP1 Forms a Growth-Promoting Complex with HNRNPL in Human Glioblastoma through Stabilization of ACTN4 and Activation of NF-κB Signaling
Source: Oxford University Press journal article supplement (doi:10.1158/1078-0432.ccr-19-0747), 2019-09-06
Supplement: 10780432ccr190747-sup-218315_2_supp_5672427_pv91nd.docx [file 10780432ccr190747-sup-218315_2_supp_5672427_pv91nd.docx]

**Supplementary Table S2. Oligonucleotide sets used in this study**

| **siRNAs or shRNAs** | **Sequences** |
| --- | --- |
| si-NC | 5'-UUCUCCGAACGUGUCACGUTT-3' |
| si-*HSP90AB1*-1 | 5'- GCGGUAAGGAUAAGAAGAATT-3' |
| si-*HSP90AB1*-2 | 5'- GCUUCGAGGUGGUAUAUAUTT-3' |
| si-*HNRNPL*-1 | 5'- GCAGCCGACAACCAAATAT-3' |
| si-*HNRNPL*-2 | 5′-CCGACAACCAAATATACAT-3′ |
| si-*ENO1*-1 | 5'-GCGTCTCCAGACCCATTAA-3' |
| si-*ENO1*-2 | 5'-CCAGACCCATTAAGTATAT-3' |
| si-*GRSF1*-1 | 5′- GCCAGAAATGGTCTTTGAA-3′ |
| si-*GRSF1*-2 | 5′-GCTCCACTCAAGCCTGTTA-3′ |
| sh-*HNRNPL*-1 | 5'- GCAGCCGACAACCAAATAT-3' |
| sh-*HNRNPL*-2 | 5′-CCGACAACCAAATATACAT-3′ |
| sh-*SChLAP1*-1 | Designed and constructed by OBiO Technology |
| sh-*SChLAP1*-2 | Designed and constructed by OBiO Technology |
| sh-NC | 5'-TTCTCCGAAGGTGTCACGG-3' |

**Supplementary Table S3. Plasmids used in this study**

| **Plasmids** | **Resources** |
| --- | --- |
| pGL4.15-Control Vector | Promega |
| pGL4-SV40 Driven Renilla Luciferase Vector | Promega |
| pGL4.32[luc2P/NF-κB-RE/Hygro] Vector | Promega |
| pcDNA3.1-T7 promoter-*SChLAP1* and its truncates | OBiO Technology |
| pcDNA3.1-3xFlag-empty vector | OBiO Technology |
| pcDNA3.1-3xFlag-HNRNPL-full length | OBiO Technology |
| pcDNA3.1-3xFlag-HNRNPL-(1-489 aa) | OBiO Technology |
| pcDNA3.1-3xFlag-HNRNPL-(1-319 aa) | OBiO Technology |
| pcDNA3.1-3xFlag-HNRNPL-(1-189aa) | OBiO Technology |
| pcDNA3.1-HA-empty vector | OBiO Technology |
| pcDNA3.1-HA-ACTN4-full length | OBiO Technology |
| pcDNA3.1-HA-ACTN4 (1-295 aa) | OBiO Technology |
| pcDNA3.1-HA-ACTN4 (296-753 aa) | OBiO Technology |
| pcDNA3.1-HA-ACTN4 (754-911 aa) | OBiO Technology |

**Supplementary Table S4. Primer sets used in this study**

| **Primer set** | **Primers** | **Sequence (5’-3’)** | **Product size (bp)** |
| --- | --- | --- | --- |
| *SChLAP1* | F  R | 5'-GGGAAGAAGTGCCAGATGCT-3'  5'-CAGCTTCTTCAGGGAGGTGG -3' | 80 |
| *SChLAP1-*Δexon2 | F  R | 5'-TTCAAGTCCTCAGGCAATCTAG-3'  5'-AAGCATCTGGCACTTCTTCC-3' | 124 |
| *SChLAP1*-AS | F  R | 5'-TGAAGTGAGTGAGACCAAGAAC-3'  5'-GATGTAGATGTTGCTTCCAGGT-3 | 143 |
| *ACTN4* | F  R | 5'-ACATAGCCGATTCTCTGCCC -3'  5'-AAACCATCAACCACCAGGCA-3' | 127 |
| *HNRNPL* | F  R | 5'-CGCCGAGCTGGAGAACTA-3'  5'-CACAAGGTCTGCTTCCACCA-3' | 100 |
| Exon1F |  | 5'-CGCGGATCCGCTTTTATGAGCTGTAACACTCACCG-3' |  |
| Exon2F |  | 5'-CGCGGATCCTGCCATCAATATTCTGAAAATGGCA-3 |  |
| Exon3F |  | 5'-CGCGGATCCCAATCTAGATGCTGGGGACACAAGG-3' |  |
| Exon4F |  | 5'-CGCGGATCCCCAAGTGGTTTAATTTCTGGAGATGG-3' |  |
| Exon5F |  | 5'-CGCGGATCCAATTGAACCAGAGTCCGGTGAATATC-3 |  |
| Exon1R |  | 5'-GCCGCTCGAGCCTGAGGACTTGAAATTGTGTCCAG-3' |  |
| Exon2R |  | 5'-GCCGCTCGACTGAAAAAGATGTAGATGTTGCTTCCA-3' |  |
| Exon3R |  | 5'-GCCGCTCGAGCTTTTAACATGTTGCTCATGTTCCTTG-3' |  |
| Exon4R |  | 5'-GCCGCTCGAGCTTCATTATTTTTGTTGTCTCCCAGC-3' |  |
| Exon5R |  | 5’-GCCGCTCGAGATTTATAAGTGAAAGAGGTTTAATGGGCTC-3' |  |
