# Supplementary material for: Long Noncoding RNA SChLAP1 Forms a Growth-Promoting Complex with HNRNPL in Human Glioblastoma through Stabilization of ACTN4 and Activation of NF-κB Signaling
Source: Oxford University Press journal article supplement (doi:10.1158/1078-0432.ccr-19-0747), 2019-09-06
Supplement: 10780432ccr190747-sup-218315_2_supp_5672430_pv91ns.docx [file 10780432ccr190747-sup-218315_2_supp_5672430_pv91ns.docx]

**Supplementary Table S8. Association between ACTN4expression and clinicopathological factors in glioma**

| Variables | No. of  cases | ACTN4 expression  low high | | *P* value |
| --- | --- | --- | --- | --- |
| **Age (year)** |  |  |  |  |
| <60 | 91 | 39 | 52 | 0.0492* |
| ≥60 | 21 | 4 | 17 |
| **Gender** |  |  |  |  |
| Male | 63 | 26 | 37 | 0.5584 |
| Female | 49 | 17 | 32 |
| **IDH1 Status** |  |  |  |  |
| WT | 51 | 11 | 40 | <0.001***  0.0385*  <0.001*** |
| MT | 61 | 32 | 29 |
| **ATRX Status**  Positive  Negative  **WHO Grade**  II  III  IV  Low grades  High grades | 76  36  30  31  51  30  82 | 24  19  24  10  9  24  19 | 52  17  6  21  42  6  63 |

WT: wild type; MT: mutant; LGG: low grade glioma, WHO II; HGG: high grade glioma, WHO III-IV. Fisher’s exact test or Chi-square test: *= *P* < 0.05; ***= *P* < 0.001.
